# Supplementary material for: Meta-Analysis of Genetic Programs between Idiopathic Pulmonary Fibrosis and Sarcoidosis
Source: PLoS One. 2013 Aug 14;8(8):e71059. doi: 10.1371/journal.pone.0071059 (PMC3743918; doi:10.1371/journal.pone.0071059)
Supplement: Table S5 — Significant expressed genes for each comparison. Supervised classifications based on TWC results (SAM method) further extracted significant expressed genes that could be used to distinct one condition from another. Comparison of normal with IPF generated 197 up regulated and 275 down regulated significant expressed genes. Between normal and sarcoidosis, there are 96 up regulated and 174 down regulated significant expressed genes. To sarcoidosis, IPF has 382 up regulated and 826 down regulated significant expressed genes. Complete gene lists were summarized in Table S5. (XLS) [file pone.0071059.s005.xls]

## Sheet: Sheet1
Normal vs. IPF			Normal vs. Sarcoidosis			IPF vs. Sarcoidosis
Up regulated genes	Down regulated genes		Up regulated genes	Down regulated genes		Up regulated genes	Down regulated genes
SPP1	ZBED2		SPP1	UPK2		SLC6A4	MSMB
MMP10	SOSTDC1		MMP1	HMGCS2		TMEM100	PLUNC
MMP1	SLC6A4		MMP7	TMC7		FCN3	LTF
MMP12	TMEM100		MMP12	S100A3		PPBP	KLK12
MMP7	FCN3		CXCL13	SLC26A9		SOSTDC1	SAA4
HS6ST2	CA4		TDO2	LDLR		HPGD	TF
POU2AF1	BTNL3		POU2AF1	SPRY4		SSTR1	CAPN13
CXCL13	STC1		NPTX2	BMP2		CA4	HSD17B2
POSTN	SLC6A14		PCSK1	ICAM4		SERPINE1	OXTR
PLA2G7	SOX7		GREM1	PVR		IL1B	SPOCK3
KIAA1199	TM4SF1		SFRP2	ICAM5		THBS1	OSTalpha
SULF1	LDLR		CILP	JUND		ICAM1	CLDN10
CABYR	PVR		POSTN	AGRP		HAS2	GDA
RARRES1	LONRF3		MMP13	SELENBP1		IL18RAP	THRSP
CTSK	ASRGL1		F2RL2	PRKCZ		SOD2	SCRG1
PCSK1	FAM107A		COL15A1	RAB17		GPR84	SCGB3A1
GREM1	RND1		COL3A1	MOSC1		CLEC4E	SCGB1A1
NPTX2	RGS16		COL1A1	KCTD14		CLEC4D	SCNN1B
NGFR	PTGS2		CXCL14	NINJ2		SLC6A14	KLK11
SERPINF1	ICAM4		CCL19	LGI3		TNIP3	KLK10
FHL2	ICAM1		SERPINB4	PKNOX2		IL1RN	ZSCAN4
IGFBP2	HBEGF		MMP10	MAPK4		TUBB1	HS6ST2
PSAT1	IL13		PLUNC	MPP3		NFE2	SPDEF
CDH2	SDPR		TMPRSS4	HOXA6		ITGA2B	TRPV4
PLA2G2A	TAL1		MUC4	LGALS4		KLRF1	HMGB3
CRLF1	PAPSS2		VTCN1	MAPT		GRM8	ESR2
COMP	KL		ATP12A	CHRM3		CLEC1B	WNT4
SCRG1	HECW2		S100A2	NKD1		PDCD1LG2	FAM83F
MMP3	EDNRB		GPR87	HIF3A		MCOLN2	NMNAT2
SPOCK1	MATN3		KRT15	TCAP		HSD11B1	FAM83A
CILP	HPGD		KRT5	GLT25D2		HSPA6	SIX4
MMP11	SLC39A8		KRT17	PTPN5		TNFAIP6	SIX1
LRRC17	SCEL		COL17A1	KLF2		CD274	SRGAP3
FNDC1	SGEF		PIP	FAM46B		TAP2	EYA2
EPHA3	MME		LCN2	BEX2		TAP1	DST
SCG2	CYP3A5		CXCL6	WWC3		IL32	TMEM45A
COL5A2	SLCO1A2		TMEM45A	NOTCH4		PLEK	BMPR1B
ASPN	GRIA1		SAA4	SEMA3B		TNFRSF1B	FHOD3
F2RL2	Gcom1		CCNA1	RASIP1		CORO1A	CNTN3
IGF1	GPM6A		CP	EPAS1		ITK	SERTAD4
TDO2	FIGF		LTF	TUFT1		TNFSF13B	SLC4A4
IL13RA2	MYH2		COMP	FKBP1B		IL21R	FA2H
SFRP2	RBP2		SLC27A2	MAFK		PIK3CG	KIAA2022
THY1	CTNND2		RTDR1	DOT1L		FMNL3	CLDN1
COL1A2	DPP6		STOML3	FXYD4		RASGRP1	PIGR
COL15A1	C8B		SPATS1	ETS2		PLA2G4C	EHF
COL3A1	SLC5A9		KCNE1	TSPYL2		CD2	TSPAN8
COL1A1	STXBP6		PTPRT	PITPNM2		CXCR6	AGR2
GABBR2	NDRG4		DNAH3	DGKD		P2RY14	SLITRK6
CCL19	PRX		SIX1	ZNF655		OBFC2A	FMN2
SERPINB4	SH2D3C		RIBC2	LSS		GCA	COL4A6
PLUNC	EGFL7		EYA1	GAB2		GPR65	POF1B
MSMB	PCDH12		KLHL13	C12orf49		BACH1	GRHL1
C20orf114	GATA2		EYA2	INPP1		PTPRC	PPAP2C
TIMP4	FOXF1		EFNB3	GRASP		LCP2	CYP2J2
SLN	S100A3		SCGB2A1	MAP3K6		GCH1	CLIC6
SYT8	DLL4		GSTA3	HEYL		EPSTI1	EPN3
TRIM29	RETN		SIX4	AHNAK		CLEC7A	RHBDL2
FAT2	AGRP		DNER	TMEM97		CLEC4A	IRF6
SERPINB5	KLRF1		C8orf47	RHOBTB2		ZNF649	CDH26
PTPRZ1	SH2D1B		TEKT1	RASSF7		NLGN4X	HSPA4L
TMEM45A	NCR1		TEKT2	ECHDC2		G0S2	DSP
SLC4A11	EMR3		LRRC46	AMOTL2		STX11	KIF21A
EYA2	DAO		CAPS	HSPC159		SMAD7	BCAS1
FHOD3	GRM8		SPAG6	FZD5		FGD5	WNK2
CLIC6	BEX1		CAPSL	TMEM88		VEGFC	CXXC4
LRRN1	TUBB1		MS4A8B	KLF6		CLEC2B	PRMT8
DST	CLEC1B		C1orf87	ASRGL1		SERPINB9	INHBB
ST6GALNAC1	ALOX12		DYNLRB2	ADRB2		NRCAM	IGFBP2
SRGAP3	UPK2		C9orf24	STX11		COL4A1	TNFRSF19
PROM2	CYP17A1		C6	UNC13D		SPRY4	PRSS12
SIX1	HMGCS2		SLITRK6	FADS3		DENND3	FZD3
MUC4	SH3GL3		KCNJ16	HPCAL1		KDR	CRISPLD1
SLC44A4	SEMA5A		CNTN3	FASN		IL18R1	TTC12
PPAP2C	LAMA3		WDR63	MICALCL		CLEC1A	MAT1A
OSTalpha	JPH1		NEK10	LONRF3		SH2D3C	LRRC56
TRPV4	KLF4		EFHB	CDKL2		ICAM2	KIF9
B3GNT3	KLF6		WDR78	GOLT1A		HSPB8	TSGA14
MAP1A	KLF2		CASC1	PLA2G3		SLCO2A1	SNCAIP
EFNB3	ST6GALNAC5		SPATA18	AMBP		ERG	TSPAN6
DNAJC12	NINJ2		C6orf97	ZNF165		CD93	PFN2
CFB	GYPE		EFCAB1	PIGA		ETS1	NAT1
FUT2	TRPC3		ARMC4	EIF5		BMPR2	DZIP3
SIX4	MPP3		C10orf79	TOX		SIRPD	C14orf142
HSPA4L	PTPN21		AGBL2	C1orf21		BMP2	NPHP1
KLHL13	GRASP		SPAG17	VPRBP		KCNN2	DZIP1L
FGF14	DENND3		DNAI1	KIF13A		CPEB2	CCDC24
CNTN3	ROBO4		CXorf41	SCHIP1		USP25	DNAJC12
CP	PITPNM2		CLDN8	CHCHD7		RAP2A	C9orf45
MMP13	NOTCH4		CHST9	CCNB3		RALA	TJP3
COL17A1	RASIP1		CLCA2	RBM3		NETO2	MAP1A
KRT17	EPAS1		ABCA13	AKAP13		PREX1	TCP11
CXCL14	ERG		MSMB	NPHS1		PTPN12	C10orf93
AKR1B10	DLC1		SOX2	C3orf33		PAG1	GPR172B
KLK12	TMEM88		C20orf85	CACNB1		WARS	CLDN3
TMPRSS4	DUSP6		C20orf114	F3		TNS3	MUC20
S100A2	KCNG3			SH3GL3		CCRL2	C8orf51
GPR87	MDGA1			HMGCS1		HHEX	RPRM
KRT15	CD83			CYP51A1		GIMAP7	CHGB
ALDH3A1	TMEM125			ACPP		GIMAP6	GRP
KRT5	SELENBP1			APOH		GIMAP8	C6orf142
VTCN1	PRDM16			BDNF		GIMAP4	AMPD1
ATP12A	BEX2			ADRB1		S100A4	ASB5
CLCA2	RHOBTB2			RBP2		MFNG	TIMP4
LTF	HSPC159			DPP6		ITM2A	CRLF1
PIP	FZD5			PRX		FLI1	OTX1
LCN2	HOXA6			BEX1		RRAS	FOXN4
SAA4	MICALCL			CTNND2		FXYD6	HRK
CXCL6	HOXD1			PNMT		GIMAP5	CYP2A13
SCGB3A1	UNC13D			ANGPTL7		KLRK1	S100P
SCGB1A1	SEMA3B			SDPR		DDX58	B3GNT3
SLC23A1	PLAC2			TIMP3		APOL3	SLN
WDR63	TUFT1			TSPAN7		LAMB1	GAS8
NEK10	PRKCZ			ERG		CLIC2	ARVCF
PTPRT	C12orf49			PTPRB		FAM105A	TFAP2B
C8orf47	MAPK4			INMT		WNT2	TRIM29
SPATS1	DHRS2			NDRG4		SGIP1	TMPRSS4
STOML3	IGFALS			GATA2		RYR2	NTS
SPATA4	ADRB2			FGFR4		LAMA4	SUSD4
DNAH9	MAPT			EGFL7		GUCY1B3	SLC4A11
SRD5A2	LGALS4			CCDC48		BTN3A3	C1orf106
CCNA1	RAB17			ADAMTS8		IFIT3	GJB5
DNAH3	FAM46B			PLA2G1B		BST2	GABRP
TEKT2	PRSS8			PGC		GPR64	SERPINB5
FABP6	MID1IP1			HSD17B6		PLA1A	PROM2
ROPN1L	GOLT1A			HHIP		IFIT2	ALDH3A1
CAPS	AMBP			SUSD2		CAMTA1	PTPRZ1
ZMYND10	TSPAN12			CACNA2D2		SPHK1	ADH7
LRRC46	PPFIBP1			LEPREL1		GPR68	SERPINB13
C1orf87	C13orf1			LAMP3		CSTA	KRT17
DNAI1	STK31			SFTPD		CD83	S100A2
LRRC18	NTN4			ABCA3		CD80	FAT2
RTDR1	MBIP			F11		ADORA2A	AKR1B10
RIBC2	C1orf21			TNNC1		HMOX1	KRT5
C22orf23	ZNF597			FIGF		FCER1G	KRT15
C11orf16	LNX2			AGER		C1QA	GPR87
C1orf92	HOMER1			SLC5A9		IL2RB	MMP10
DLEC1	USP25			CRTAC1		FSCN1	FUT2
CCDC37	CD55			CA4		KLRB1	MMP7
C6orf118	HMGCS1			TTN		CST7	CP
KIF19	DNM3			SLC22A3		CETP	SYT8
ALOX15	USP44			SLCO1A2		SPN	KLK13
SLITRK6	TOX			CYP3A5		CCL5	FCGBP
CRISP2	PIP5K1B			MATN3		ITGA5	COL17A1
SERPINI2	OCLN			GPM6A		GNAI2	CEACAM5
STK33	FAM105A			SEC14L4		ENG	BNC1
NME5	EPB41L5			SGEF		CTSW	SOX2
IQCG	COL4A4			EMP2		BATF2	ST6GALNAC1
EFHC1	COL4A3			LMO7		SUCNR1	EYA1
LRRC34	MGC42105			JPH1		SLC15A3	KCNJ16
C14orf45	CHRM3			SGCG		OAS1	MUC4
CAPS2	CHRM2			HYAL1		RTN1	VTCN1
SPATA18	CDKL2			C11orf9		ITGAL	ATP12A
C6orf97	DPCR1			SLIT2		SIGLEC9	LCN2
WDR49	ABCC13			PTPN21		SIGLEC7	KRT23
TSGA10	SLITRK2			C1orf198		HCK	CLCA2
WDR78	GPR116			DENND3		P2RX7	C20orf114
AGBL2	FASN			DAPK2		PIK3AP1	TTC16
CASC1	NRGN			GRIA1		CD14	TEKT3
DNAH7	SPRY4			Gcom1		P2RY13	RIBC2
AK7	STX11			CNTN6		IFNG	LRRC43
C1orf114	BMP2			ANXA3		EGR2	SPAG16
SCGB2A1	ADRB1			VEPH1		TFEC	C1orf92
GSTA3	ITIH2			ACOXL		SNX10	SPAG8
SLC27A2	ADCY8			ACADL		BCAT1	CCDC37
KCNJ16	FAM71A			PDZD2		TLR8	DLEC1
EYA1	SHANK2			LAMA3		HK3	CRISP2
CLDN8	IL20RA			DLC1		CCR1	SCGB2A1
SLC22A4	SLC27A6			C6orf155		SLC6A12	SPATA4
KCNE1	PARD6B			ABCC13		CD300LF	C22orf23
DNAJA4	NEDD4L			CGNL1		FBP1	RTDR1
TTC25	EIF5			CAV1		LYZ	C8orf47
TEKT3	PIGA			ANKRD29		TLR7	CXorf41
CCDC19	F3			IL13		AMICA1	GSTA3
C9orf116	LRRN3					CYBB	DNER
CCDC65	PTPRB					ARRDC4	CXCL6
C15orf26	DACH1					CYP2C9	TTLL10
DNER	CAV1					CCR2	PIP
KATNAL2	C6orf155					HK2	CCNA1
ANKRD43	SYNPO2L					IGSF6	ANKRD43
SOX2	OLFML2A					FGR	NXF5
TEKT1	FZD8					VAMP5	ZNF214
MS4A8B	CCDC48					SCARF1	PPM1E
C9orf24	CAV3					CMKLR1	RNF32
C20orf85	HEY1					ACE	FSIP1
SPAG6	FRY					DICER1	CLGN
CAPSL	CGNL1					ARL4C	PNLDC1
EFCAB1	C1orf198					ADRB1	HRASLS2
DYNLRB2	COL13A1					GZMH	FAM3D
C6	PER3					CD244	TMEM17
CHST9	HLF					CSF2	PLEKHB1
SPAG17	CUL3					RGS18	HHLA2
ARMC4	ANGPTL7					MNDA	BBOX1
CXorf41	SLIT2					FCN1	KIAA1377
EFHB	SEMA6A					S100A8	PKIB
C10orf79	TSPAN7					AQP9	ESRRG
ABCA13	C1orf115					RGS16	MYB
	GIMAP5					INHBA	KATNAL2
	SLCO2A1					HBEGF	LRRC34
	HYAL1					C8orf4	IQCH
	HPCAL1					MSR1	SPA17
	RNF182					SERPINA1	NME5
	TIMP3					SCD	C14orf45
	HIF3A					DOK2	LRRC23
	KCNMB4					TREM1	IQCG
	GALNTL4					C1orf162	DNAJA4
	AHNAK					ALOX5AP	SLC22A4
	NPR3					CPM	KCNE1
	FLJ34503					ALOX15B	C9orf116
	CD300LG					LIPG	PACRG
	AFF3					FAP	WDR54
	SEC14L4					CCL8	DNAH11
	SGCG					CXCL9	PZP
	GDF10					CXCL11	OSBPL6
	INMT					LGALS2	IFT172
	FGFR4					CD86	C20orf12
	ADAMTS8					P2RY1	NBEA
	PNMT					SH2D1B	KLHL13
	DBC1					PRF1	FGF14
	VEPH1					NKG7	MAK
	PCSK9					GZMB	NEK11
	SLC22A3					GNLY	FBXL13
	ACOXL					TSPAN7	DYX1C1
	TTN					TIE1	DNALI1
	SNX25					GPR146	EFHC1
	LRRK2					LRRC32	CETN2
	SLCO4C1					THBD	CAPS2
	ACADL					TMEM2	SERPINI2
	FMO5					HYAL2	KIF6
	TNNC1					BCL6B	FLJ40852
	GPRC5A					TEAD4	ELMOD1
	SPOCK2					FADS3	TMC5
	CLIC3					PTGIR	CDS1
	SUSD2					GPR4	PPP1R14C
	EMP2					PDGFB	MLF1
	DAPK2					RASIP1	C8orf34
	C11orf9					NES	GRAMD1C
	BDNF					EGFL7	ENPP5
	RNF128					LMCD1	IL20RA
	LMO7					FGF2	C11orf52
	KAL1					NRGN	RFX2
	SLC1A1					LONRF3	AGBL4
	PDZD2					S100A3	ERBB4
	ANKRD29					ASRGL1	SLC4A8
	ANXA3					GATA2	DIO1
	CNTN6					C20orf46	TTC21A
	CLIC5					RSPO2	TSNAXIP1
	AQP4					RNF182	C10orf92
	SLC26A9					NDRG4	KNDC1
	CDH16					HYAL1	ANKMY1
	SFTPD					TBX2	C20orf195
	LAMP3					SLIT2	BAIAP3
	ABCA3					GYPE	KIF19
	LEPREL1					SEMA6A	RBM24
	CACNA2D2					PTPRB	ALDH1L1
	F11					PAPSS2	EFNB3
	LGI3					KCNMB4	C6orf154
	CA2					DISP1	NGEF
	MEGF11					CDO1	LRRC18
	APOH					AGTR1	CNGA3
	C4BPA					PHLDB2	C22orf15
	PGC					GJA1	C9orf98
	PLA2G1B					GNG11	WDR65
	HHIP					ITGB6	C14orf174
	HSD17B6					ATP11A	BTG4
	CRTAC1					LPL	SLC23A1
	CLDN18					ATP8A2	SPATS1
	AGER					SPARC	C6orf118
	AGTR2					LRCH2	WFDC6
	CYP3A4					RAPGEF4	CXorf22
	ESAM					LPHN2	SRD5A2
	CAV2					SDPR	DNAH3
	AADAC					EMCN	SLC44A4
	BTNL8					ARHGAP29	MORN3
	FOSB					ROBO4	TEKT2
						KL	ZMYND10
						TBX3	LRRC46
						NOTCH4	SPATA18
						ARHGEF10	WDR63
						DACH1	TTC25
						CDH19	ROPN1L
						RAMP3	EFCAB1
						RAMP2	CAPS
						FOXF1	WDR49
						KCNK3	TSGA10
						DLC1	DNAH5
						AQP1	STK33
						RSAD2	C3orf15
						IFI44L	C1orf114
						FLJ34503	C14orf50
						STXBP6	ARMC2
						EDNRB	SPAG17
						Gcom1	DNAH7
						CYP3A5	NEK10
						SLCO1A2	C11orf16
						RGS9	DNAI1
						C6orf114	CCDC19
						CLEC4M	C6orf97
						IL7R	AK7
						PDGFRA	CCDC65
						INMT	C15orf26
						HOXA5	SLC27A2
						SPOCK2	SPAG6
						HPCAL1	CAPSL
						ACVRL1	C10orf79
						COL4A4	CHST9
						MME	STOML3
						AFF3	DNAH9
						CSF3R	ABCA13
						CD300LG	TEKT1
						SCTR	C1orf87
						RASGRF1	MS4A8B
						VEPH1	C20orf85
						LGI3	WDR78
						F11	AGBL2
						CHI3L2	CASC1
						SMAD6	EFHB
						SFTPD	ARMC4
						SCEL	PTPRT
						HHIP	CACNG6
						LRRK2	DYNLRB2
						LAMP3	C9orf24
						ABCA3	FABP6
						HSD17B6	CLDN8
						CACNA2D2	C6
						SLC5A9	ALOX15
						GUCY1A2
						COL4A3
						GPR116
						DAPK2
						MIA2
						EFNB2
						ANKRD50
						TTN
						ACOXL
						ACADL
						SEMA6D
						LRRN3
						GJA5
						NPR3
						HECW2
						CALCRL
						SEMA3G
						PCDH12
						PRX
						LAMC3
						ST6GALNAC5
						SLC39A8
						LEPREL1
						ETV1
						CAV1
						ANKRD29
						FRAS1
						GRIA1
						SLC1A1
						ANXA3
						SGEF
						EMP2
						C11orf9
						CLIC5
						CLIC3
						RETN
						OLR1
						OASL
						STAC
						KCNK17
						CA2
						TMC7
						CLCN5
						DPCR1
						BDNF
						ABCC13
						CD5L
						APLN
						IL1RL1
						AGTR2
						ZBED2
						C4BPA
						PLA2G1B
						FIGF
						CLDN18
						AGER
