# Supplementary material for: Meta-Analysis of Genetic Programs between Idiopathic Pulmonary Fibrosis and Sarcoidosis
Source: PLoS One. 2013 Aug 14;8(8):e71059. doi: 10.1371/journal.pone.0071059 (PMC3743918; doi:10.1371/journal.pone.0071059)
Supplement: Table S7 — Functional network complexes and modules. Signature genes of each comparison gave functional network complexes. The highly connected network regions are so called modules that could play vital role in diseases development. Table S7 describe the top two modules of each complex. (XLS) [file pone.0071059.s007.xls]

## Sheet: Sheet1
Network features (Modules) for each comparison
Comparison	Key Modules (Core mediators)	Score	Mediators GeneBank descriptions
Normal versus IPF	MAP1A	9.966	http://www.ncbi.nlm.nih.gov/gene/4130
	CAV1	2.614	http://www.ncbi.nlm.nih.gov/gene/857
Normal versus Sarcoidosis	PRKCZ	4.32	http://www.ncbi.nlm.nih.gov/gene/5590
	SIX1	3.723	http://www.ncbi.nlm.nih.gov/gene/6495
IPF versus Sarcoidosis	MYB	12.26	http://www.ncbi.nlm.nih.gov/gene/4602
	BMPR2	1.25	http://www.ncbi.nlm.nih.gov/gene/659
